# Supplementary material for: Type 2 deiodinase–dependent surge in thyroid hormone controls muscle stem cell quiescence and self-renewal
Source: JCI journal article supplement (doi:10.1172/jci194925), 2026-03-05
Supplement: sd2 [file 2]

Wt cD2KO

114.6-

92.7-

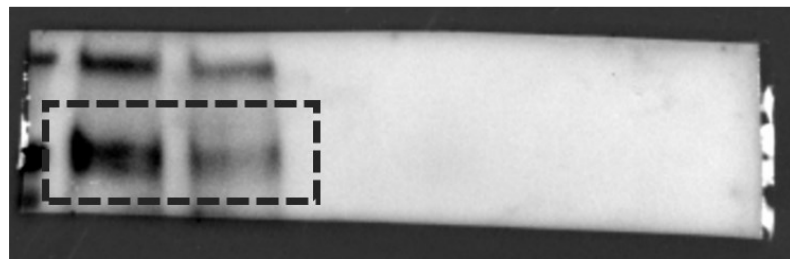

N1ICD # 4147

64.6-

58.1-

35-

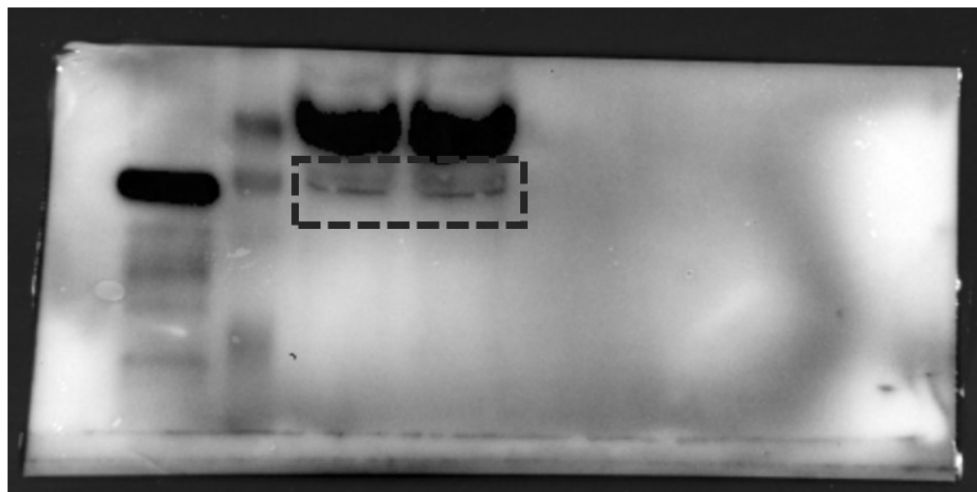

Tubulin

Figure 4E

Wt cD2KO

169.4-

114.6-

92.7-

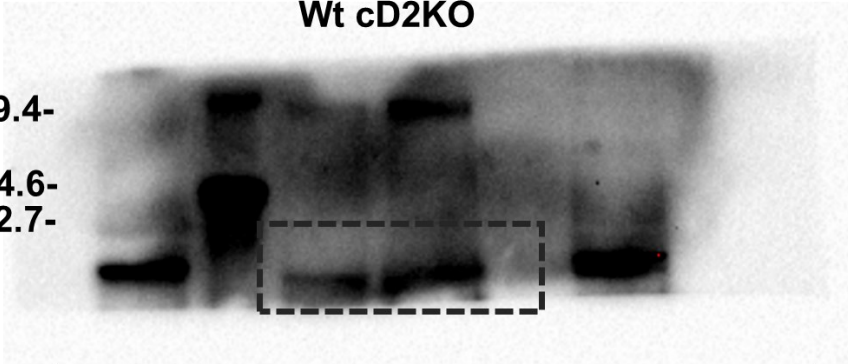

pS6K

169.4-

114.6-

92.7-

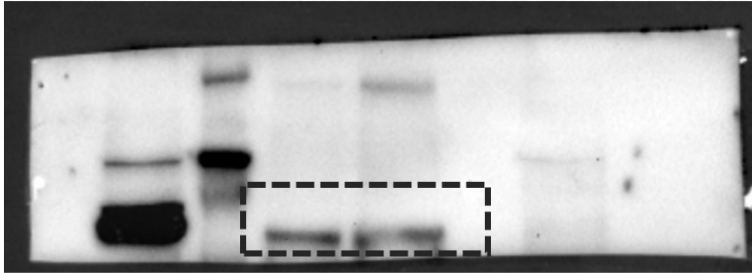

S6K

64.6-

58.1-

35-

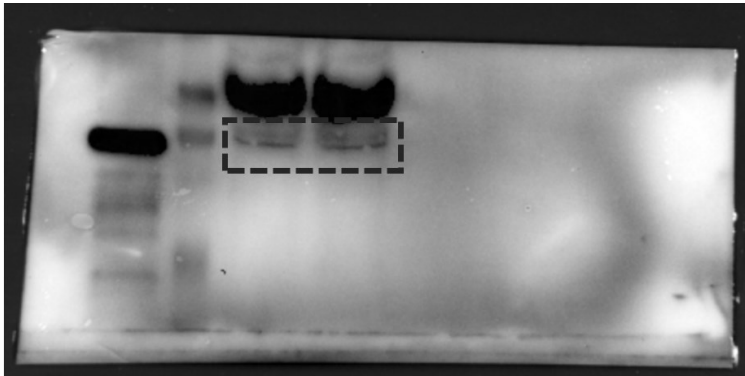

Tubulin

Figure 5F

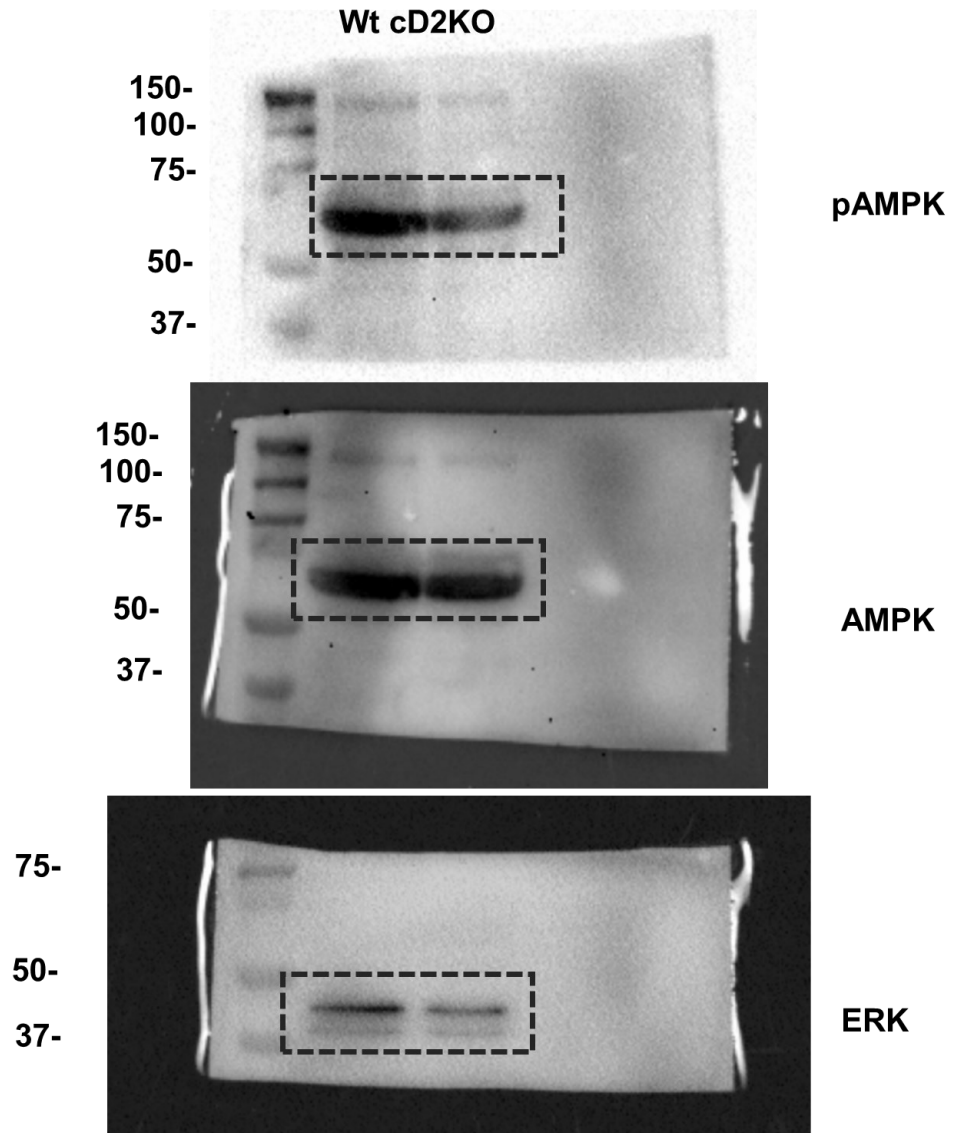

Figure 5G

Charcoal-stripped serum  
TH 0 24 72 hours

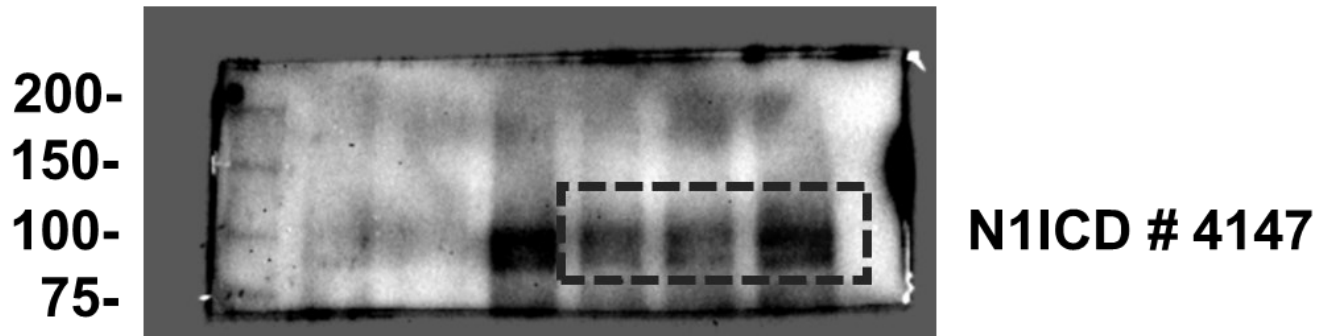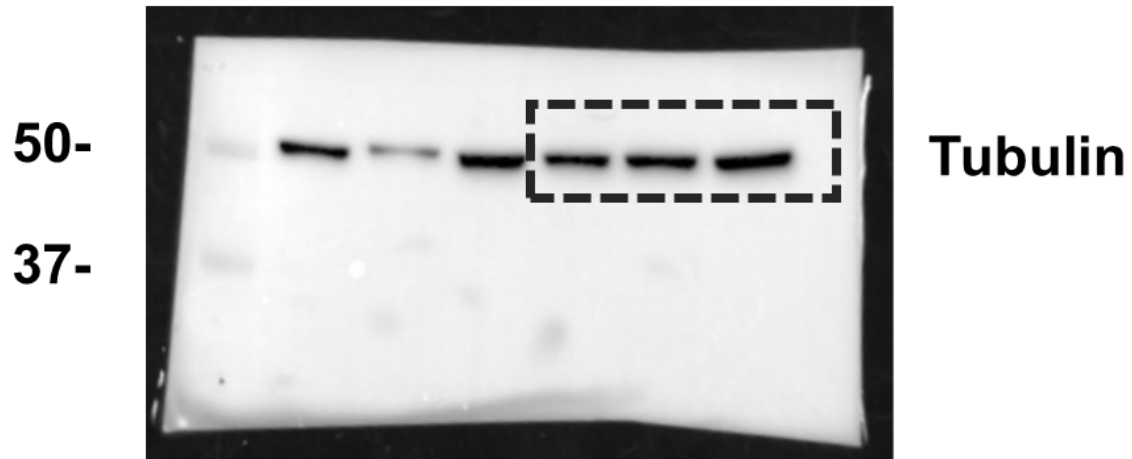

Figure S7A

Charcoal-stripped serum

|      |   |   |   |   |   |
|------|---|---|---|---|---|
| TH   | - | + | + | + | + |
| DAPT | - | - | - | + | + |

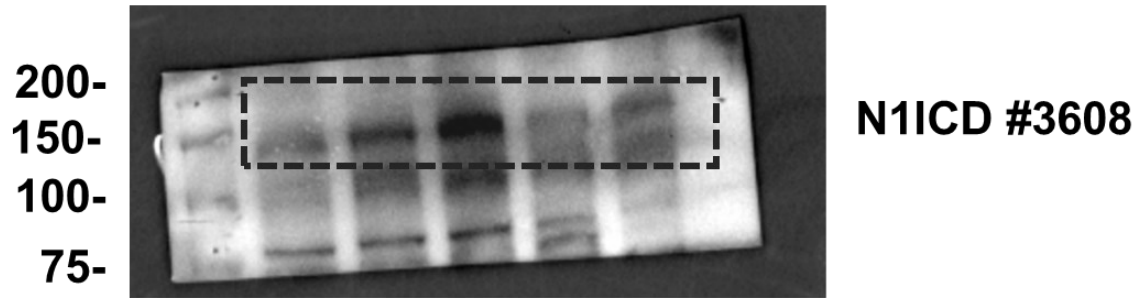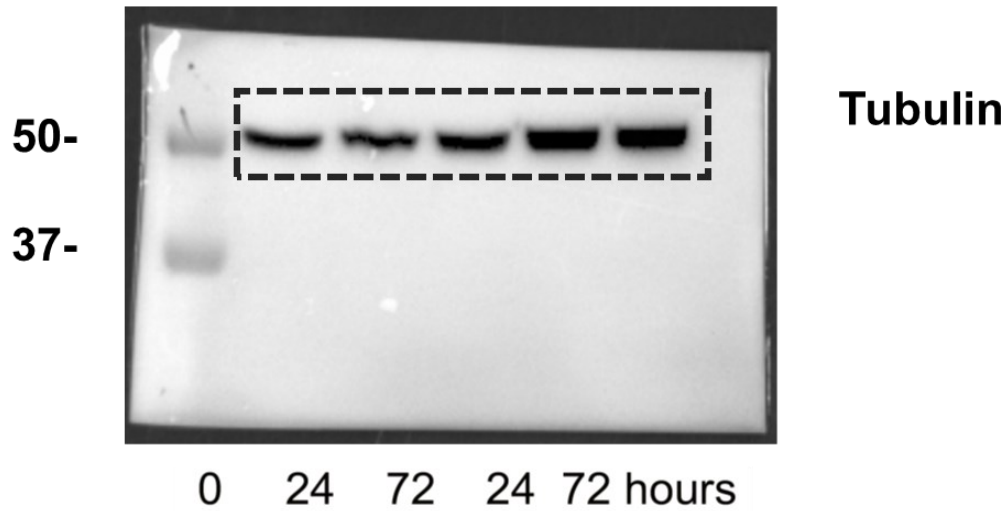

Figure S7E

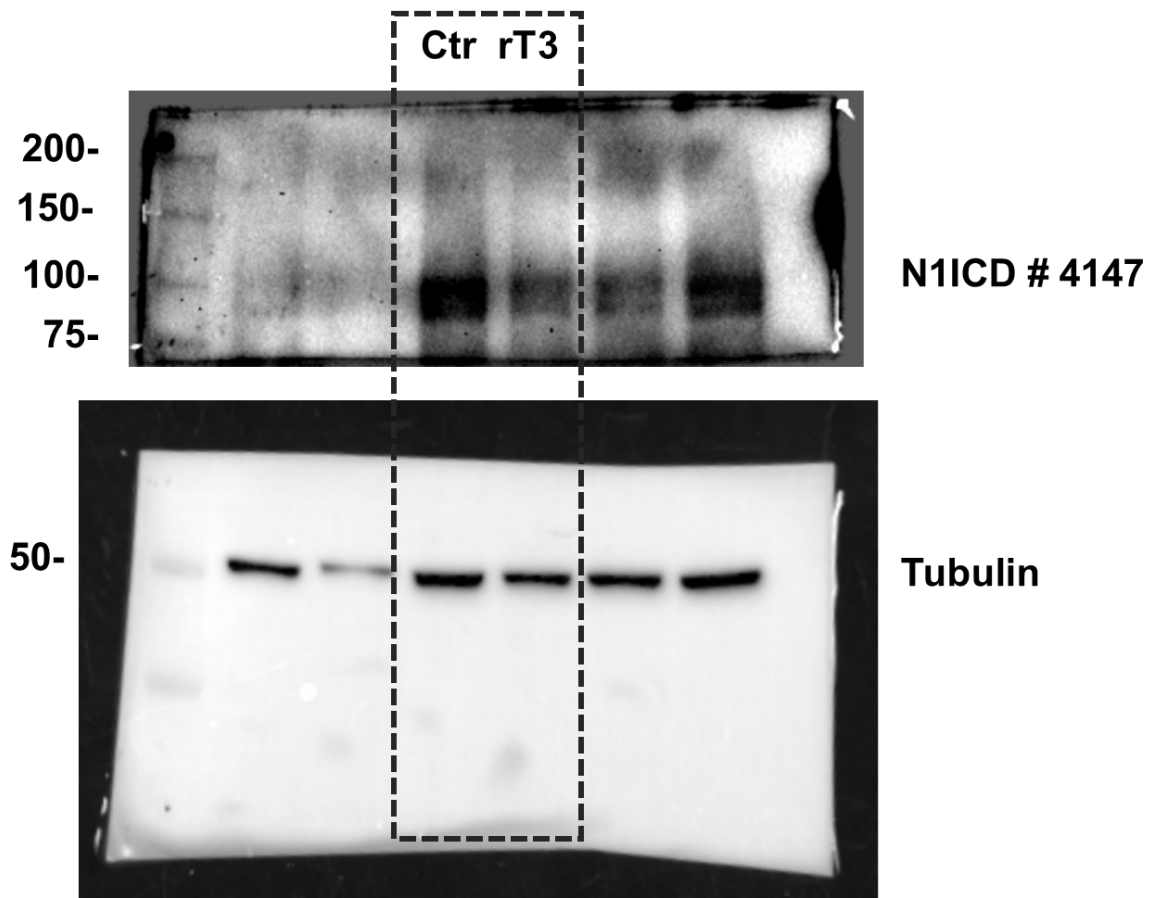

Figure S9B
